# Selection for increased post-infection survival ameliorates mating induced immune suppression in *Drosophila melanogaster* females

Aabeer Basu<sup>1,3</sup>, Aparajita Singh<sup>1</sup>, Ruchitha B G<sup>2</sup>, Nagaraj Guru Prasad<sup>1,3</sup>

<sup>1</sup>Indian Institute of Science Education and Research (IISER) Mohali, India

<sup>2</sup>Indian Institute of Science Education and Research (IISER) Pune, India

<sup>3</sup>Correspondence: aabeerkbasu@gmail.com, prasad@iisermohali.ac.in

Short title: Mating induced immune suppression in *Drosophila*.

Author contribution: Conceptualization & Methodology, AB; Investigation, AB, AS, and RBG; Data curation, Formal analysis, Visualization & Writing (first draft), AB; Writing (review and editing), AB, AS, RBG, and NGP; Funding acquisition and Supervision, NGP.

Declaration of interests: The authors have no competing interests to declare.

Funding: The study was funded by intramural funding from IISER Mohali, India. AB was supported by Senior Research Fellowship for graduate students from CSIR, Govt. of India. AS was supported by Senior Research Fellowship for graduate students from University Grants Commission, Govt. of India. RBG was supported by Summer Research Fellowship Program for undergraduate students funded by JNCASR, Bangalore.

Acknowledgements: The authors thank Prof. P Cornelis (Vrije Universiteit Brussel, Belgium) for providing us with *Pseudomonas entomophila* L48, and Prof. B Lazzaro (Cornell University, USA) for providing us with *Enterococcus faecalis* isolate.

## 1 **Abstract**

2 Sexual activity (mating) negatively affects immune function in various insect species, in both  
3 sexes. In the experiments reported in this manuscript, we tested if hosts adapted to regular  
4 pathogen challenges are less susceptible to mating induced immune suppression, using  
5 experimentally evolved *Drosophila melanogaster* populations selected for increased post-  
6 infection survival when infected with a Gram-positive bacterium, *Enterococcus faecalis*.  
7 Mating increased susceptibility of females to bacterial pathogens, but in a pathogen specific  
8 manner. Mating-induced increase in susceptibility was also affected by host evolutionary  
9 history, with females from selected populations exhibiting similar post-infection survival  
10 irrespective of mating status, while females from control populations became more susceptible  
11 to bacterial infections after mating. Post-infection survival of males, irrespective of their  
12 evolutionary history, was not affected by their mating status. We therefore conclude that hosts  
13 evolved to better survive bacterial infections are also better at resisting mating-induced increase  
14 in susceptibility to infections in *Drosophila melanogaster*.

15

16 **Keywords:** *Drosophila melanogaster*, experimental evolution, bacterial pathogens, post-  
17 infection survival, post-mating immune suppression

## 18 1. Introduction

19 Reproduction-immunity trade-offs in insects and other invertebrates work in either direction:  
20 infected hosts (while mounting an immune defense) exhibit reduced reproductive output, and  
21 hosts investing towards reproduction often have compromised immune function (Lawniczak et  
22 al 2007, Schwenke et al 2016). Sexual activity (mating) induced immune suppression has been  
23 observed in very many insect species, including *Matrona basilaris japonica* (Japanese  
24 calopterygid damselfly, Siva-Jothy et al 1998), *Tenebrio molitor* (mealworm beetle, Rolf and  
25 Siva-Jothy 2002), *Allonemobius socius* (striped ground cricket, Fedorka et al 2004), *Formica*  
26 *paralugubris* (wood ants, Castella et al 2009), and *Drosophila melanogaster* (McKean and  
27 Nunney 2001, McKean and Nunney 2005, Fedorka et al 2007, Short and Lazzaro 2010, Khan  
28 and Prasad 2011, Short et al 2012, Schwenke and Lazzaro 2017, Gupta et al 2021, Gordon et  
29 al 2022), in case of both males and females. Mating induced immune suppression can manifest  
30 as increased post-infection mortality, reduced capacity of clearing systemic pathogen load,  
31 and/or down regulation of a specific component of the immune system.

32 There are many nuances associated with mating induced immune suppression in insects. One,  
33 different components of the immune system may be affected differently, in terms of both  
34 direction and degree, by sexual activity in a particular insect species. For example, mating  
35 reduces hemocyte count, encapsulation ability, and lytic activity, but increases phenol oxidase  
36 (PO) activity in female crickets (*A. socius*, Fedorka et al 2004). Similarly in wood ant queens  
37 (*F. paralugubris*), mating reduces PO activity but increases antibacterial defenses (Castella et  
38 al 2009). Two, the same immune component may be affected differently in different insect  
39 species. For example, PO activity increases after mating in female crickets (*A. socius*, Fedorka  
40 et al 2004), but decreases after mating in case of female meal worm beetles (*T. molitor*, Rolf  
41 and Siva-Jothy 2002) and wood ant queens (*F. paralugubris*, Castella et al 2009). Three, post-  
42 mating immune suppression can be sex specific. For example, mating increases PO activity in  
43 females but reduces PO activity in male crickets (*A. socius*, Fedorka et al 2004).

44 Four, differences in individual components of immune system may not translate into actualized  
45 resistance to diseases, in terms of post-infection survival and systemic pathogen clearance. For  
46 example, in *D. melanogaster* ovoD1 mutant females (in which oogenesis is inhibited before  
47 vitellogenesis), mating leads to immediate upregulation of various anti-microbial peptide  
48 (AMP) genes, but mated females die more compared to virgin females when infected with the  
49 bacterium *Pseudomonas aeruginosa* (Fedorka et al 2007). Five, in cases where post-infection

50 survival is affected by mating, the effects can be pathogen specific. For example, mated *D.*  
51 *melanogaster* females are more susceptible to infections with *Providencia rettgeri* and  
52 *Providencia alcalifaciens* compared to virgins, but not in case of infections with *Enterococcus*  
53 *faecalis* and *Pseudomonas entomophila* (Short and Lazzaro 2010). In case of all these four  
54 pathogens, the differences in survival between virgin and mated females was correlated with  
55 differences in systemic bacterial load (Short and Lazzaro 2010).

56 Six, in certain insect species, mating can have a positive effect on post-infection fitness of the  
57 host, in both females (reviewed in Oku et al 2019) and males. For example, mating reduces  
58 likelihood of infection by Trypanosoma parasite *Crithidia bombi* in bumblebee (*Bombus*  
59 *terrestris*) males and queens (Barribeau and Schmid-Hempel 2017). Mating also improves  
60 survival following bacterial infection in *D. melanogaster* males, but in a pathogen specific  
61 manner (Gupta et al 2013, Syed et al 2020). Various studies using *D. melanogaster* females  
62 have reported mating induced changes (mostly upregulation) in expression pattern of genes  
63 involved in immune defense, without measuring post-infection survival of the host or systemic  
64 pathogen clearance (McGraw et al 2004, Peng et al 2005, Winterhalter and Fedorka 2009, Gioti  
65 et al 2012, Fricke et al 2020). Since changes in sub-organismal immune components do not  
66 always translate into differential host survival (Adamo 2004b), it becomes difficult to interpret  
67 the results from such studies from the vantage point of eco-immunology (Adamo 2004a). And  
68 seven, observed effect of mating on the immune system is often dependent on the time elapsed  
69 since the mating event, for example as observed in *F. parulugubris* (Castella et al 2009) and  
70 *D. melanogaster* (Fedorka et al 2007, Winterhalter and Fedorka 2009, Short et al 2012; but see  
71 Gordon et al 2022).

72 In the present study we tested if host evolutionary history determined the difference between  
73 post-infection survival of virgin and mated flies in *Drosophila melanogaster*, in case of both  
74 females and males. We evolved a set of replicated fly populations, selecting for increased post-  
75 infection survival following infection with a Gram-positive bacterium, *Enterococcus faecalis*.  
76 The selected populations evolved better post infection survival compared to the ancestrally  
77 paired control populations within 35 generations of forward selection (Singh et al 2021). We  
78 subjected virgin and mated females from the selected and the control populations to infection  
79 with three pathogens: *E. faecalis*, the native pathogen used for selection, and two novel  
80 pathogens, *Bacillus thuringiensis* and *Pseudomonas entomophila*. Our results indicate that  
81 whether mated females die more following infection, compared to the virgin flies, is contingent  
82 upon host evolutionary history, pathogen identity, and the interaction between these two

83 factors. Males, both mated and virgins, were infected only with the native pathogen. Results  
84 show that for this pathogen, mating does not change the susceptibility of males to infection.

## 85 **2. Materials and Methods**

### 86 **2.1 Pathogen handling and infection protocol**

87 Three bacterial pathogens were used in this study: (a) *Enterococcus faecalis* (Lazzaro et al  
88 2006), a Gram-positive bacterium, which was used in regular maintenance of the EPN  
89 populations (Singh et al 2021), and in experiments, and (b) *Bacillus thuringiensis* (DSM 2046,  
90 obtained from Leibniz Institute DSMZ-German Collection of Microorganisms and Cell  
91 Cultures GmbH), a Gram-positive bacterium, and (c) *Pseudomonas entomophila* (strain L48,  
92 Vodovar et al 2005, Mulet et al 2012), a Gram-negative bacterium, both of which were used  
93 only for experimental infections.

94 The bacteria are stored as glycerol stocks (17%) in -80 °C. To obtain live bacterial cells for  
95 infections, 10 ml lysogeny broth (Luria Bertani Broth, Miler, HiMedia) is inoculated with  
96 glycerol stocks of the required bacterium and incubated overnight with aeration (150 rpm  
97 shaker incubator) at suitable temperature (37 °C for *E. faecalis*, 30 °C for *B. thuringiensis*, and  
98 27 °C for *P. entomophila*). 100 microliters from this primary culture is inoculated into 10 ml  
99 fresh lysogeny broth and incubated for the necessary amount of time to obtain confluent ( $OD_{600}$   
100 = 1.0-1.2) cultures. The bacterial cells are pelleted down using centrifugation and resuspended  
101 in sterile  $MgSO_4$  (10 mM) buffer to obtain the required optical density ( $OD_{600}$ ) for infection.  
102 Flies are infected, under light  $CO_2$  anaesthesia, by pricking them on the dorsolateral side of  
103 their thorax with a 0.1 mm Minutien pin (Fine Scientific Tools, USA) dipped in the bacterial  
104 suspension. Sham-infections (injury controls) are carried out in the same fashion, except by  
105 dipping the pins in sterile  $MgSO_4$  (10 mM) buffer.

106 During regular maintenance of the EPN populations, the flies from the E<sub>1-4</sub> populations (see  
107 below) are infected with an *E. faecalis* suspension of  $OD_{600} = 1.2$ . For all experimental  
108 infections (see below), for all three pathogens, flies were infected with a bacterial suspension  
109 of  $OD_{600} = 1.0$ .

### 110 **2.2 EPN selection regime**

111 The experiments reported in this study were carried out using the EPN populations, consisting  
112 of twelve populations categorized into three selection regimes (Singh et al 2021).

113 **E<sub>1-4</sub>: Populations selected for better survival following infection with the Gram-positive**  
114 **bacterium *Enterococcus faecalis*.** Every generation, 2–3-day old adult flies (200 females and  
115 200 males) are subjected to infection with *E. faecalis*, and 96-hours post-infection, the

116 survivors are allowed to reproduce and contribute to the next generation. At the end of 96 hours,  
117 on average 100 females and 100 males are left alive in each of the  $E_{1-4}$  populations.

118 **P<sub>1-4</sub>: Sham-infected control populations.** Every generation, 2–3-day old adult flies (100  
119 females and 100 males) are subjected to sham-infection, and 96-hours post-sham-infection, the  
120 survivors are allowed to reproduce and contribute to the next generation.

121 **N<sub>1-4</sub>: Uninfected control populations.** Every generation, 2–3-day old adult flies (100 females  
122 and 100 males) are subjected to light CO<sub>2</sub> anesthesia only, and 96-hours post-procedure, the  
123 survivors are allowed to reproduce and contribute to the next generation. (Under usual  
124 circumstances, no mortality occurs in the  $P_{1-4}$  and  $N_{1-4}$  populations during maintenance of the  
125 selection regimes.)

126 The EPN populations were derived from the ancestral Blue Ridge Baseline (BRB<sub>1-4</sub>)  
127 populations. The  $E_1$ ,  $P_1$ , and  $N_1$  populations were derived from the BRB<sub>1</sub> population and  
128 constitutes ‘block 1’ of the experimental evolution regime. Similarly,  $E_2$ ,  $P_2$ , and  $N_2$   
129 populations were derived from the BRB<sub>2</sub> population and constitutes ‘block 2’, and so on. This  
130 *block design* implies that  $E_1$ ,  $P_1$ , and  $N_1$  have a more recent common ancestor, compared to  $E_1$   
131 and  $E_2$ , or  $P_1$  and  $P_2$ , and so on. Populations belonging to each block were handled together,  
132 both during maintenance of the populations and during experiments. Blocks were also used as  
133 experimental and statistical replicates.

134 The maintenance of the EPN populations have been previously described (Singh et al 2021,  
135 Singh et al 2022). The EPN populations are maintained on banana-jaggery-yeast food medium.  
136 Every generation, eggs are collected at a density of 60-80 eggs per vial (with 6-8 ml food  
137 medium). 10 such rearing vials (9 cm height × 2.5 cm diameter) are set up for each of the 12  
138 populations. These vials are incubated at 25 °C, 60% RH, and a 12:12 LD cycle. Under such  
139 maintenance conditions, eggs develop into adults within 9-10 days of egg collection. On day  
140 12 post-egg laying (PEL), flies from each population are subjected to selection according to  
141 their identity, as described above. The adults stay in the rearing vial till day 12 PEL, and are  
142 sexually mature, and sexually active, by the time they are subjected to selection. After being  
143 subjected to selection, the flies are housed in plexiglass cages (14 cm × 16 cm × 13 cm), one  
144 cage for each population. The cages are provided with fresh food medium, on a 60 mm Petri  
145 plate, on every alternate day. On day 16 PEL eggs are collected from the surviving flies in each  
146 cage to start the next generation.

### 147 **2.3 Pre-experiment standardization**

148 Prior to experiments, flies from the three selection regimes were reared for a generation under  
149 ancestral maintenance conditions. This is done to account for any non-genetic parental effects  
150 (Rose 1984), and flies thus generated are referred to as *standardized* flies. To generate  
151 standardized flies, eggs were collected from all the populations at a density of 60-80 eggs per  
152 vial; 10 such vials were set up per population. The vials were incubated under standard  
153 maintenance conditions described above. On day 12 PEL, the adults were transferred to  
154 plexiglass cages (14 cm × 16 cm × 13 cm) with food plates (Petri plates, 60 mm diameter).  
155 Eggs for experimental flies were collected from these *standardised* population cages.

## 156 **2.4 Experiment design**

### 157 **Experiment 1.a. Effect of mating on post-infection survival of females from E, P, and N** 158 **populations when infected with the native pathogen (*E. faecalis*).**

159 In this experiment we tested if focal females from E, P, and N populations exhibited mating-  
160 induced increase in susceptibility to *E. faecalis* when mated with common BRB males. The  
161 experiment for each block was carried out separately. This experiment was done after 45  
162 generations of forward selection.

163 Eggs were collected from standardized E, P, and N flies, at a density of 60-80 eggs per vial; 20  
164 such vials were set up per population. Similarly, eggs were collected from the BRB flies, at a  
165 density of 60-80 eggs per vial; 30 such vials were set up. These vials were incubated under  
166 standard maintenance conditions (described in section 2.2), and on 10<sup>th</sup> day post-egg laying  
167 (PEL), freshly eclosing flies were collected as virgins and housed in single sex vials. Virgin  
168 females were collected for the E, P, and N populations, and housed at a density of 8 females  
169 per vial (each vial with 1.5-2 ml of standard food medium); 50 vials of virgin females were  
170 collected per population. Virgin males were collected from BRB population and housed at a  
171 density of 10 males per vial; 90 vials of virgin males were collected.

172 On 12<sup>th</sup> day PEL, to obtain mated females, 30 vials of virgin females from each population (E,  
173 P, and N) were combined (without anesthesia) individually with vials of BRB virgin males,  
174 individually in fresh food vials. These vials were visually observed to ensure that the each of  
175 the eight females in a vial had mated at least once. Thereafter, 20 vials from each population  
176 were set aside for infection, and the other 10 vials were monitored for re-mating rate (see  
177 below). The females and males continued to be housed together from the point of initiation of  
178 the mating set-up till the time of infection. The remaining 20 vials of virgin females from each  
179 population (E, P, and N) were simply transferred to fresh food vials. 4-5 hours after the



180 initiation of the mating set-up, mated females and males were anesthetized, vial by vial, and  
181 the females were subjected to infection with *E. faecalis* (or sham-infections); the males were  
182 discarded. Virgin females were also infected simultaneously. After infections, the females were  
183 placed in fresh food vials. In total, 10 vials of infected females (n = 80 females) and 5 vials of  
184 sham-infected females (n = 40 females) were set up per population (E, P, and N), per mating  
185 status (virgin and mated), per block. These vials were monitored for mortality, every 4-6 hours,  
186 for 96 hours post-infection. Flies alive at the end of 48 hours were shifted to fresh food vials,  
187 and flies alive at the end of 96 hours were discarded (right censored).

188 To get an estimate of re-mating rate of females from different populations, 10 vials per  
189 population (E, P, and N) were monitored, every 15 minutes, for 5 hours. The total number of  
190 mating events were recorded for each vial. The number of mating events from each vial was  
191 used as the unit of replication for remating rate. (Since all vials had the same number of females  
192 and males, the absolute number of mating events was used for analysis without any per-female  
193 normalization.)

#### 194 **Experiment 1.b. Effect of mating on post-infection survival of males from E, P, and N** 195 **populations when infected with the native pathogen (*E. faecalis*).**

196 In this experiment we tested if focal males from E, P, and N populations exhibited mating-  
197 induced increase in susceptibility to *E. faecalis* when mated with common BRB females. The  
198 experiment for each block was carried out separately. This experiment was done after 45  
199 generations of forward selection.

200 Eggs were collected from standardized E, P, and N flies, at a density of 60-80 eggs per vial; 20  
201 such vials were set up per population. Similarly, eggs were collected from the BRB flies, at a  
202 density of 60-80 eggs per vial; 30 such vials were set up. These vials were incubated under  
203 standard maintenance conditions (described in section 2.2), and on 10<sup>th</sup> day post-egg laying  
204 (PEL), freshly eclosing flies were collected as virgins and housed in single sex vials. Virgin  
205 males were collected for the E, P, and N populations, and housed at a density of 8 males per  
206 vial (each vial with 1.5-2 ml of standard food medium); 50 vials of virgin males were collected  
207 per population. Virgin females were collected from BRB population and housed at a density of  
208 10 females per vial; 90 vials of virgin females were collected.

209 On 12<sup>th</sup> day PEL, to obtain mated males, 30 vials of virgin males from each population (E, P,  
210 and N) were combined (without anesthesia) individually with vials of BRB virgin females,  
211 individually in fresh food vials. These vials were visually observed to ensure that the each of

212 the eight males in a vial had mated at least once. Thereafter, 20 vials from each population  
213 were set aside for infection, and the other 10 vials were monitored for re-mating rate (see  
214 below). The males and females continued to be housed together from the point of initiation of  
215 the mating set-up till the time of infection. The remaining 20 vials of virgin males from each  
216 population (E, P, and N) were simply transferred to fresh food vials. 4-5 hours after the  
217 initiation of the mating set-up, mated males and females were anesthetized, vial by vial, and  
218 the males were subjected to infection with *E. faecalis* (or sham-infections); the females were  
219 discarded. Virgin males were also infected simultaneously. After infections, the males were  
220 placed in fresh food vials. In total, 10 vials of infected males (n = 80 males) and 5 vials of  
221 sham-infected males (n = 40 males) were set up per population (E, P, and N), per mating status  
222 (virgin and mated), per block. These vials were monitored for mortality, every 4-6 hours, for  
223 96 hours post-infection. Flies alive at the end of 48 hours were shifted to fresh food vials, and  
224 flies alive at the end of 96 hours were discarded (right censored).

225 To get an estimate of re-mating rate of males from different populations, 10 vials per population  
226 (E, P, and N) were monitored, every 15 minutes, for 5 hours. The total number of mating events  
227 were recorded for each vial. The number of mating events from each vial was used as the unit  
228 of replication for remating rate. (Since all vials had the same number of males and females, the  
229 absolute number of mating events was used for analysis without any per-male normalization.)

230 **Experiment 2. Effect of mating on post-infection survival of females from E and P**  
231 **populations when infected with two novel pathogens (*B. thuringiensis* and *P.***  
232 ***entomophila*).**

233 In this experiment we tested if focal females from E and P populations exhibited mating-  
234 induced increase in susceptibility to *B. thuringiensis* and *P. entomophila* when mated with  
235 common BRB males. The experiment for each block was carried out separately. This  
236 experiment was done after 55 generations of forward selection.

237 Eggs were collected from standardized E and P flies, at a density of 60-80 eggs per vial; 20  
238 such vials were set up per population. Similarly, eggs were collected from the BRB flies, at a  
239 density of 60-80 eggs per vial; 25 such vials were set up. These vials were incubated under  
240 standard maintenance conditions (described in section 2.2), and on 10<sup>th</sup> day post-egg laying  
241 (PEL), freshly eclosing flies were collected as virgins and housed in single sex vials. Virgin  
242 females were collected for the E and P populations, and housed at a density of 8 females per  
243 vial (each vial with 1.5-2 ml of standard food medium); 50 vials of virgin females were

244 collected per population. Virgin males were collected from BRB population and housed at a  
245 density of 10 males per vial; 75 vials of virgin males were collected.

246 On 12<sup>th</sup> day PEL, to obtain mated females, 40 vials of virgin females from each population (E  
247 and P) were combined (without anesthesia) individually with vials of BRB virgin males,  
248 individually in fresh food vials. These vials were visually observed to ensure that the each of  
249 the eight females in a vial had mated at least once. The females and males continued to be  
250 housed together from the point of initiation of the mating set-up till the time of infection. The  
251 remaining 20 vials of virgin females from each population (E and P) were simply transferred  
252 to fresh food vials. 4-5 hours after the initiation of the mating set-up, mated females and males  
253 were anesthetized, vial by vial, and the females were subjected to infection with either *B.*  
254 *thuringiensis* or *P. entomophila* (or sham-infections); the males were discarded. Virgin females  
255 were also infected simultaneously. After infections, the females were placed in fresh food vials.  
256 In total, 10 vials of *B. thuringiensis* infected females (n = 80 females), 10 vials of *P.*  
257 *entomophila* infected females (n = 80 females), and 5 vials of sham-infected females (n = 40  
258 females) were set up per population (E and P), per mating status (virgin and mated), per block.  
259 These vials were monitored for mortality, every 4-6 hours, for 96 hours post-infection. Flies  
260 alive at the end of 48 hours were shifted to fresh food vials, and flies alive at the end of 96  
261 hours were discarded (right censored).

## 262 **2.5 Statistical analysis**

263 Survival data of infected flies, from experiments 1(a), 1(b), and 2, was modeled as

264  $\text{Survival} \sim \text{Selection history} + \text{Mating status} + (\text{Selection history} \times \text{Mating status}) + (1|\text{Block}),$   
265 using mixed-effects Cox proportional hazards, where selection history, mating status, and their  
266 interaction were modeled as fixed factors, and block identity was modeled as a random factor.  
267 This model was subjected to analysis of deviance (type II) for significance testing for the fixed  
268 factors (tabulated in Table 1). Survival data for the three pathogens, and both sexes, were  
269 analyzed separately. Since there was negligible mortality observed in sham-infected flies  
270 (Figure 1), only the survival data of infected flies were subjected to statistical analysis.

271 Hazard ratio for mortality of infected mated flies, relative to the infected virgin flies, was  
272 calculated for flies from each population (E, P, and N) using the mixed-effects Cox-  
273 proportional hazards model

274  $\text{Survival} \sim \text{Mating status} + (1|\text{Block}),$

275 where mating status was used as a fixed factor and block identity as a random factor. Hazard  
276 ratios for the three pathogens, and both sexes, were calculated separately (represented  
277 graphically in Figure 2, and tabulated in Table S1).

278 Remating rate data was analyzed using analysis of variance (ANOVA, type-III) where selection  
279 history was included as a fixed factor, and block identity and selection  $\times$  block interaction were  
280 included as random effects. Significance tests for the random effects included in ANOVA are  
281 tabulated in Table S2.

282 All analyses were carried out using R statistical software (version 4.1.0; R Core Team 2021),  
283 using various functions from the *survival* (Therneau 2021), *coxme* (Therneau 2020), and  
284 *lmerTest* (Kuznetsova et al 2017) packages. Graphs were created using the *ggplot2* (Wikham  
285 2016) and *survminer* (Kassambara et al 2021) packages.

## 286 **3. Results**

### 287 **3.1 Survival of females infected with *Enterococcus faecalis***

288 Post-infection survival of females when infected with *E. faecalis* was significantly affected by  
289 selection history, but not by mating status, or selection history  $\times$  mating status interaction  
290 (Table 1.a, Figure 1.a). The mated females from either E (hazard ratio, 95% confidence  
291 interval: 0.945, 0.769-1.161), P (HR, 95% CI: 0.989, 0.826-1.183), or N (HR, 95% CI: 1.143,  
292 0.962-1.360) population did not differ in post-infection survival relative to the virgin females  
293 (Figure 2.a).

### 294 **3.2 Survival of males infected with *E. faecalis***

295 Post-infection survival of males when infected with *E. faecalis* was significantly affected by  
296 selection history, but not by mating status, or selection history  $\times$  mating status interaction  
297 (Table 1.b, Figure 1.b). The mated males from either E (HR, 95% CI: 1.074, 0.866-1.332), P  
298 (HR, 95% CI: 1.013, 0.839-1.224), or N (HR, 95% CI: 1.049, 0.866-1.270) population did not  
299 differ in post-infection survival relative to the virgin males (Figure 2.b).

### 300 **3.3 Survival of females infected with *Bacillus thuringiensis***

301 Post-infection survival of females when infected with *B. thuringiensis* was significantly  
302 affected by selection history, mating status, and selection history  $\times$  mating status interaction  
303 (Table 1.c, Figure 1.c). Pooling females from both mating treatments, E females (HR, 95% CI:  
304 0.266, 0.224-0.317) survived better relative to P females. Among E females, there was no  
305 difference between survival of virgin and mated females (HR, 95% CI: 0.852, 0.640-1.135),  
306 but among P females, mated females (HR, 95% CI: 1.673, 1.383-2.025) exhibited greater  
307 mortality relative to virgin females (Figure 2.c).

### 308 **3.4 Survival of females infected with *Pseudomonas entomophila***

309 Post-infection survival of females when infected with *P. entomophila* was significantly  
310 affected by selection history, mating status, and selection history  $\times$  mating status interaction  
311 (Table 1.d, Figure 1.d). Pooling females from both mating treatments, E females (HR, 95% CI:  
312 0.355, 0.313-0.403) survived better relative to P females. Among E females, there was no  
313 difference between survival of virgin and mated females (HR, 95% CI: 1.191, 0.989-1.434),  
314 but among P females, mated females (HR, 95% CI: 1.582, 1.349-1.854) exhibited greater  
315 mortality relative to virgin females (Figure 2.d).

316 **3.5 Remating rate**

317 Remating rate was not affected by selection history in case of either female ( $F_{2,8} = 1.222$ ,  $p =$   
318  $0.344$ ) or male ( $F_{2,8} = 0.36$ ,  $p = 0.708$ ) flies from the E, P, and N populations (Figure 3).

## 319 4. Discussion and Conclusion

320 In this study, we measured the effect of sexual activity (mating) on post-infection survival of  
321 female and male flies (*Drosophila melanogaster*) upon infection with bacterial pathogens. We  
322 tested if the effect of mating on post-infection survival was determined by the evolutionary  
323 history of the hosts. We experimentally evolved fly populations for increased survival  
324 following infection with a Gram-positive bacterium, *Enterococcus faecalis* (Singh et al 2021).  
325 We infected virgin and mated females from these evolved (E<sub>1-4</sub>) populations, and their  
326 ancestrally paired control (P<sub>1-4</sub> and N<sub>1-4</sub>) populations (see Materials and Methods for more  
327 details), with three bacterial pathogens: *E. faecalis*, *Bacillus thuringiensis*, and *Pseudomonas*  
328 *entomophila*. *E. faecalis* is the *native* pathogen, i.e., the pathogen used for selection in the  
329 experimental evolution set-up. *B. thuringiensis* (Gram-positive) and *P. entomophila* (Gram-  
330 negative) represent two *novel* pathogens, one of which has the same Gram-character as the  
331 native pathogen while the other doesn't.

332 When infected with *E. faecalis*, the females from the selected populations had better survival  
333 compared to the females from the control populations (figure 1.a). This proved that the  
334 selection process was a success, and this observation agreed with results reported previously  
335 (Singh et al 2021, Singh et al 2022). Additionally, the mated and the virgin females did not  
336 differ from one another in terms of post infection survival when infected with *E. faecalis* (figure  
337 2.a). When infected with the novel pathogens, the females from the selected populations again  
338 survived better than the females of the control populations, in case of both *B. thuringiensis*  
339 (figure 1.c) and *P. entomophila* (figure 1.d). This replicated and verified previous results from  
340 these populations where it was demonstrated that the selected populations have evolved cross-  
341 resistance against a wide range of novel bacterial pathogens (Singh et al 2021). Furthermore,  
342 in case of both *B. thuringiensis* (figure 2.c) and *P. entomophila* (figure 2.d), the mated females  
343 from the control populations died more after being infected, relative to the virgin females.  
344 There was no difference in post-infection survival of virgin and mated females from the  
345 selected populations in case of either of the novel pathogens (figure 2.c and 2.d).

346 Altogether, results from our experiments suggest that females from the selected populations do  
347 not suffer any mating induced change in susceptibility to bacterial infections. On the other  
348 hand, females from the control populations do suffer a mating induced increase in susceptibility  
349 to bacterial infections, but in a pathogen specific manner. Pathogen specific differences in  
350 survival between virgin and mated females has been reported previously in other studies (Short

351 and Lazzaro 2010, Basu et al 2022). We report here that the pathogen specificity of the mating-  
352 induced change in susceptibility to infections can be modified by host evolutionary history.  
353 Since we did not find any difference in re-mating rate of females from the selected and the  
354 control populations (figure 3), the differences in mating-induced increase in susceptibility to  
355 infections cannot be explained by differential re-mating rate. Previous studies have also shown  
356 that mating rate has no effect on mating-induced immune suppression in females but does have  
357 a major effect in case of males (McKean and Nunney 2001, McKean and Nunney 2005).

358 When we infected virgin and mated males from the selected and the control populations with  
359 *E. faecalis*, males from selected populations in general survived better than the males from  
360 control populations (figure 1.b), attesting to that fact that selection had successfully worked in  
361 the E populations (Singh et al 2021), but post-infection survival was not affected by mating in  
362 any of the populations (figure 2.b). Since we only infected males with the native pathogen, we  
363 cannot comment on either evolution of cross-resistance or pathogen-specific mating induced  
364 change in susceptibility to pathogens. In case of males too, the re-mating rate did not differ  
365 between the selected and the control populations (figure 3).

366 During regular maintenance of the experimental evolution regime, the flies of the selected (E<sub>1</sub>-  
367 4) populations are already mated at the time of infection. Therefore, we hypothesized that E  
368 flies must be under selection to evolve to counteract the negative effects of mating on immune  
369 function, if there are indeed any negative effects. Our results show that E females are in fact  
370 better at counteracting the negative effects of mating on immune function (measured as post-  
371 infection survival). This may be driven by either (a) E females having evolved to optimize  
372 immune defense against bacterial pathogens with a resource deprived immune system (because  
373 of mating-induced re-routing of resources towards reproduction), or (b) E females having  
374 evolved to counteract the mating-dependent signals that encourage females to invest towards  
375 reproduction. Based on the present data we cannot differentiate between these two possibilities.  
376 In *D. melanogaster* females, sex peptide transferred from males during mating induces  
377 production of Juvenile Hormone (JH) in female corpus allota, which reduces a female's ability  
378 to defend against bacterial infections (Schwenke and Lazzaro 2017). JH also encourages  
379 investment towards reproductive functions (Flatt et al 2005) and suppresses expression of AMP  
380 genes (Flatt et al 2008). Therefore, we hypothesize that the selected populations may have  
381 evolved to be resistant to JH-mediated modifications of the immune system that follow sexual  
382 activity in females.



383 It has been previously suggested that starvation induces a re-structuring of the insect immune  
384 system towards a new functional equilibrium, so that the immune system can maintain optimal  
385 functionality even in a resource limited environment (Adamo et al 2016, Adamo 2017). Based  
386 on the results obtained in this study, and in previously published studies (discussed in the  
387 Introduction), we hypothesize that sexual activity (mating) has a similar influence on the insect  
388 immune system, and that this influence is specific to each host species. This would explain (a)  
389 why different immune components are affected differently by mating (viz. Fedorka et al 2004,  
390 Castella et al 2009), (b) why the same immune components are affected differently in different  
391 species (viz. Fedorka et al 2004, Rolf and Siva-Jothy 2002, Castella et al 2009), and (c) why  
392 the effect of mating on post-infection survival is pathogen specific (Short and Lazzaro 2010,  
393 Basu et al 2022). The exact mechanism governing this mating-induced re-structuring of insect  
394 immune system is yet to be defined, but it can be assumed that Juvenile Hormone (JH) is a key  
395 regulator of this process. In *D. melanogaster*, increased production of JH in mated females,  
396 induced by sex peptide transferred by males during copulation, increases susceptibility of  
397 females to bacterial infections (Schwenke and Lazzaro 2017). Inhibition of JH synthesis  
398 nullifies the negative effects of mating on PO activity in male and female *T. molitor* (Rolf and  
399 Siva-Jothy 2002). Additionally, signals from the germline cells may also be key regulators of  
400 mating-induced re-structuring of the insect immune system (Fedorka et al 2007, Short et al  
401 2012, Short and Lazzaro 2013, Rodrigues et al 2021).

402 Assuming our above hypothesis holds true, we further propose that the evolutionary history of  
403 the host organism decides the degree of re-structuring that occurs in a mated individual,  
404 compared to a virgin individual. This would explain why females from our selected populations  
405 do not exhibit any mating-induced change in susceptibility to pathogens, both native and novel,  
406 but the females from the control populations do exhibit increased mortality after mating in case  
407 of both novel pathogens. It is possible that host sex also determines the degree of immune  
408 system re-structuring, but we are not able to comment on that because we only measured post-  
409 infection mortality of the males using the native pathogen.

410 To summarize, using fly populations experimentally evolved to better survive bacterial (*E.*  
411 *faecalis*) infections, we tested the role of host evolutionary history in determining if sexually  
412 active flies are more susceptible to bacterial infection compared to sexually inactive flies. We  
413 observe that whether mated females are more susceptible to infection is dependent upon the  
414 pathogen used for infection. In case of pathogens where we do observe an increased  
415 susceptibility of mated females to infection, females from the evolved populations exhibit no

416 mating-induced change in susceptibility to infections, while the females from the control  
417 populations become more susceptible to infections after mating. This suggests that host  
418 evolutionary history, and adaptation to better survive a pathogen challenge, reduces a host's  
419 vulnerability to mating-induced immune suppression in *Drosophila melanogaster*.

## 420 Figures and Tables

421 **Figure 1.** Post-infection survival of virgin and mated flies from the E, P, and N populations:  
422 (A) females infected with *Enterococcus faecalis*; (B) males infected with *Enterococcus*  
423 *faecalis*; (C) females infected with *Bacillus thuringiensis*; and (D) females infected with  
424 *Pseudomonas entomophila*.

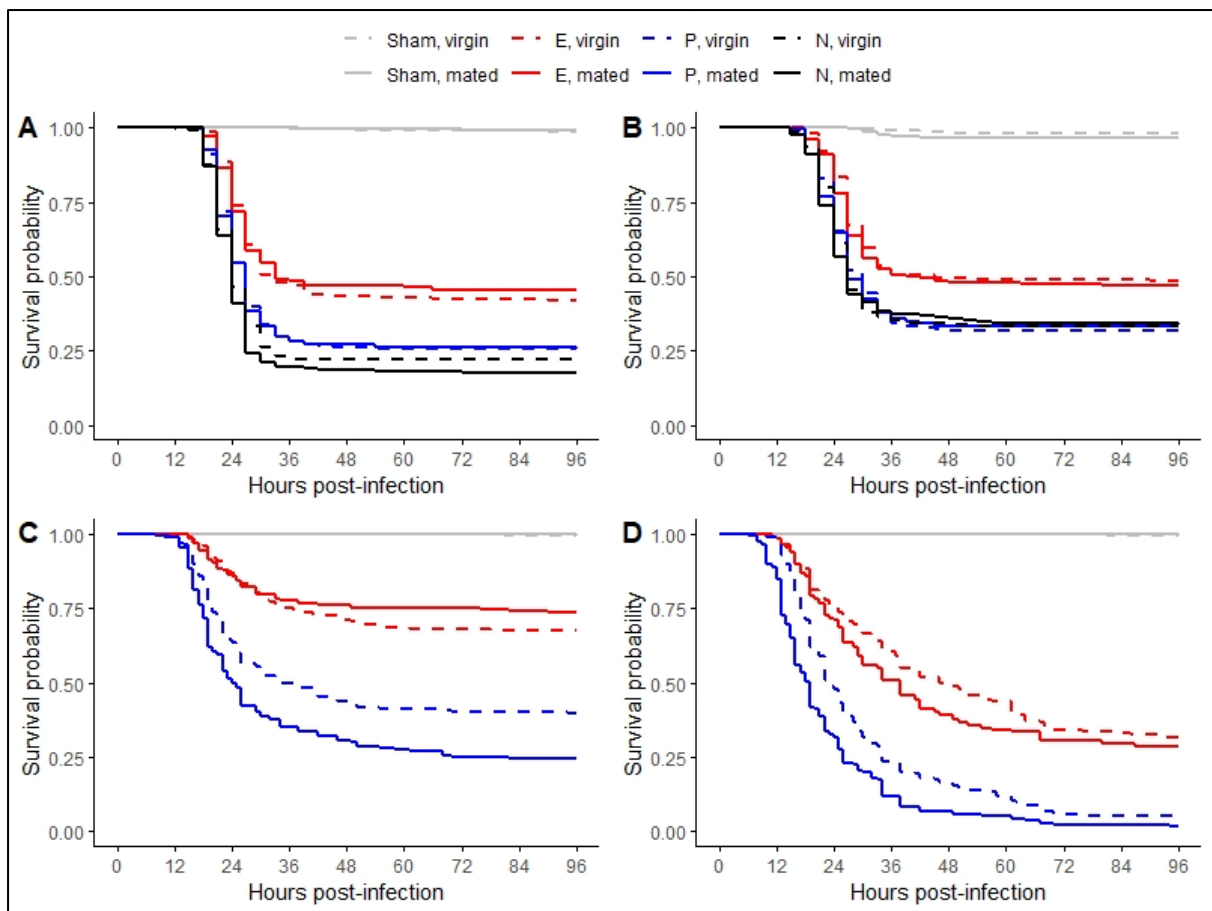

425

426

427 **Figure 2.** Hazard ratio (mixed-effects Cox proportional hazards method) for mortality of mated  
428 flies, relative to virgin flies, from the E, P, and N populations: (A) females infected with  
429 *Enterococcus faecalis*; (B) males infected with *Enterococcus faecalis*; (C) females infected  
430 with *Bacillus thuringiensis*; and (D) females infected with *Pseudomonas entomophila*. The  
431 horizontal line, at hazard ratio equals to 1, represents the hazard for virgin female for the  
432 corresponding population. (Error bars represent 95% confidence intervals.)

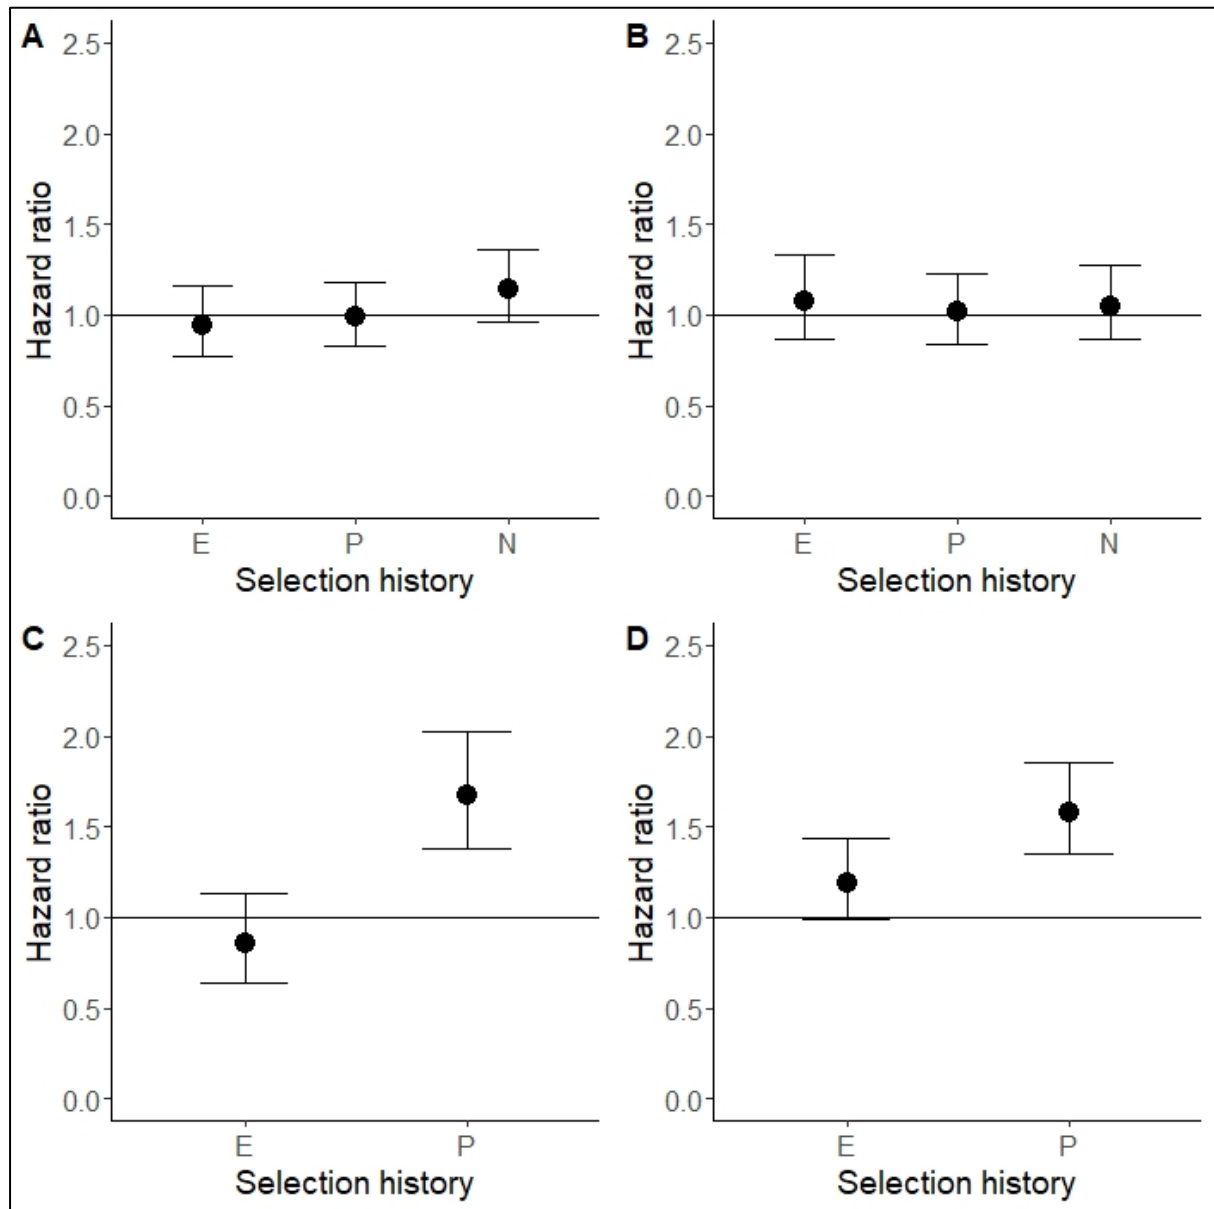

433

434

435 **Figure 3.** Remating rate of females and males of the E, P, and N populations. (Error bars  
436 represent 95% confidence intervals.)

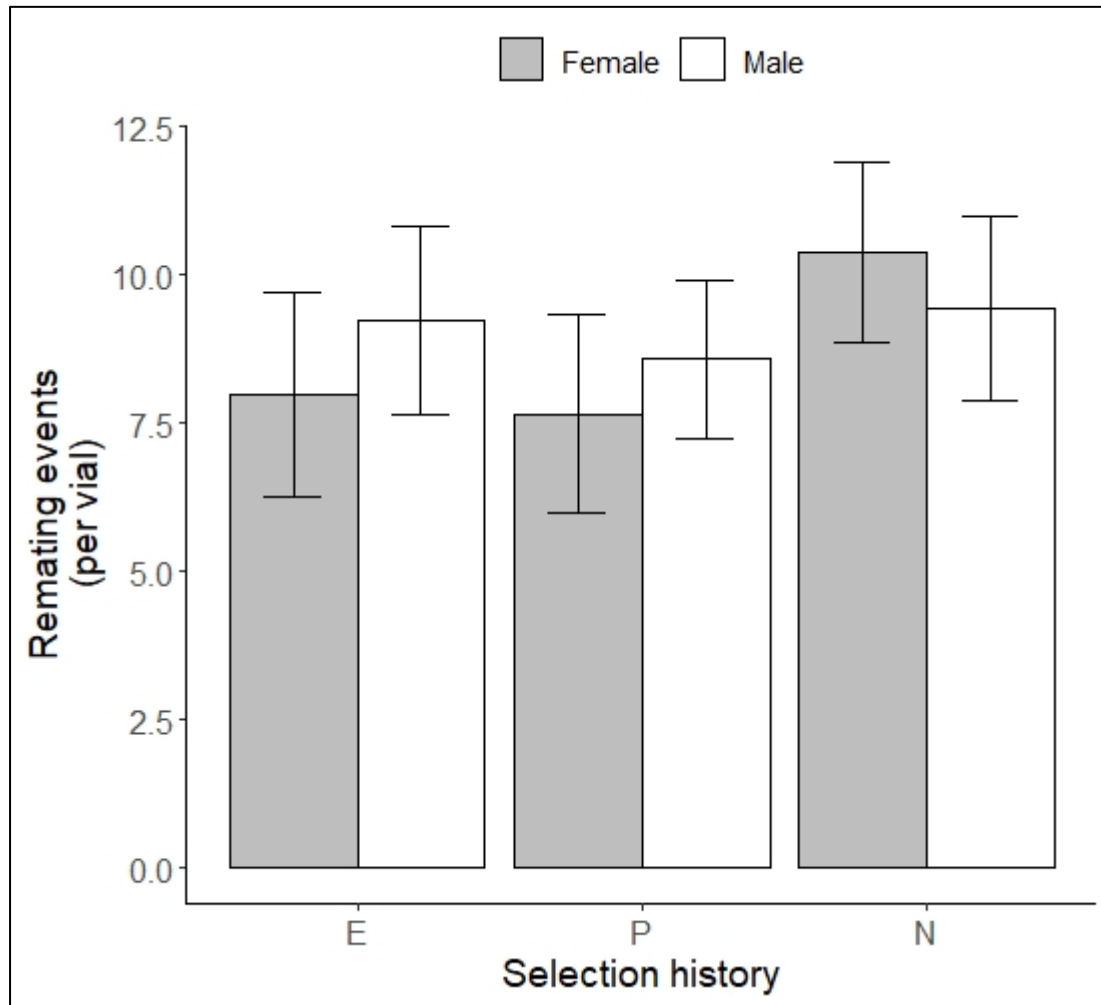

437

438

439 **Table 1.** Analysis of deviance (type II) for the effect of selection history, mating status, and  
 440 their interaction on post-infection survival of virgin and mated flies from the E, P, and N  
 441 populations: (a) females infected with *Enterococcus faecalis*; (b) males infected with  
 442 *Enterococcus faecalis*; (c) females infected with *Bacillus thuringiensis*; and (d) females  
 443 infected with *Pseudomonas entomophila*.

| Fixed factors                                                                                                | DF       | Chi-square value | p-value            |
|--------------------------------------------------------------------------------------------------------------|----------|------------------|--------------------|
| (a) Survival of E, P, and N females, either virgin or mated, when infected with <i>Enterococcus faecalis</i> |          |                  |                    |
| <b>Selection history</b>                                                                                     | <b>2</b> | <b>133.8540</b>  | <b>&lt;2.2e-16</b> |
| Mating status                                                                                                | 1        | 0.4964           | 0.4811             |
| Selection history ×<br>Mating status                                                                         | 2        | 2.3661           | 0.3063             |
| (b) Survival of E, P, and N males, either virgin or mated, when infected with <i>Enterococcus faecalis</i>   |          |                  |                    |
| <b>Selection history</b>                                                                                     | <b>2</b> | <b>56.2585</b>   | <b>6.076e-13</b>   |
| Mating status                                                                                                | 1        | 0.3799           | 0.5377             |
| Selection history ×<br>Mating status                                                                         | 2        | 0.1319           | 0.9362             |
| (c) Survival of E and P females, either virgin or mated, when infected with <i>Bacillus thuringiensis</i>    |          |                  |                    |
| <b>Selection history</b>                                                                                     | <b>1</b> | <b>224.067</b>   | <b>&lt;2.2e-16</b> |
| <b>Mating status</b>                                                                                         | <b>1</b> | <b>16.080</b>    | <b>6.073e-05</b>   |
| <b>Selection history ×<br/>Mating status</b>                                                                 | <b>1</b> | <b>17.146</b>    | <b>3.461e-05</b>   |
| (d) Survival of E and P females, either virgin or mated, when infected with <i>Pseudomonas entomophila</i>   |          |                  |                    |
| <b>Selection history</b>                                                                                     | <b>1</b> | <b>267.3126</b>  | <b>&lt;2.2e-16</b> |
| <b>Mating status</b>                                                                                         | <b>1</b> | <b>27.7184</b>   | <b>1.403e-07</b>   |
| <b>Selection history ×<br/>Mating status</b>                                                                 | <b>1</b> | <b>5.6996</b>    | <b>0.01697</b>     |

444

445

## 446 **Supplementary Materials**

447 **Table S1.** Hazard ratio of mated flies relative to virgin flies from E, P, and N populations,  
448 when subjected to infection with different pathogens.

449 **Table S2.** Significance tests for random effect included in analysis of variance (ANOVA) of  
450 remating rate data for (a) females, and (b) males.

451

## 452 **References**

453 Adamo, S.A., 2004a. How should behavioural ecologists interpret measurements of  
454 immunity? *Animal behaviour*, 6(68), pp.1443-1449.

455 Adamo, S.A., 2004b. Estimating disease resistance in insects: phenoloxidase and  
456 lysozyme-like activity and disease resistance in the cricket *Gryllus texensis*. *Journal of*  
457 *insect physiology*, 50(2-3), pp.209-216.

458 Adamo, S.A., Davies, G., Easy, R., Kovalko, I. and Turnbull, K.F., 2016. Reconfiguration  
459 of the immune system network during food limitation in the caterpillar *Manduca*  
460 *sexta*. *Journal of Experimental Biology*, 219(5), pp.706-718.

461 Adamo, S.A., 2017. Stress responses sculpt the insect immune system, optimizing  
462 defense in an ever-changing world. *Developmental & Comparative Immunology*, 66,  
463 pp.24-32.

464 Barribeau, S.M. and Schmid-Hempel, P., 2017. Sexual healing: mating induces a  
465 protective immune response in bumblebees. *Journal of evolutionary biology*, 30(1),  
466 pp.202-209.

467 Basu, A., Singh, A., Sehgal, S., Madaan, T. and Prasad, N.G., 2022. Discordant effects of  
468 resource limitation on host survival and systemic pathogen growth in *Drosophila*-bacteria  
469 infection models: resistance vs. tolerance. *bioRxiv*.

470 Castella, G., Christe, P. and Chapuisat, M., 2009. Mating triggers dynamic immune  
471 regulations in wood ant queens. *Journal of evolutionary biology*, 22(3), pp.564-570.

472 Fedorka, K.M., Zuk, M. and Mousseau, T.A., 2004. Immune suppression and the cost of  
473 reproduction in the ground cricket, *Allonemobius socius*. *Evolution*, 58(11), pp.2478-  
474 2485.

- 475 Fedorka, K.M., Linder, J.E., Winterhalter, W. and Promislow, D., 2007. Post-mating  
476 disparity between potential and realized immune response in *Drosophila*  
477 *melanogaster*. *Proceedings of the Royal Society B: Biological Sciences*, 274(1614),  
478 pp.1211-1217.
- 479 Flatt, T., Tu, M.P. and Tatar, M., 2005. Hormonal pleiotropy and the juvenile hormone  
480 regulation of *Drosophila* development and life history. *Bioessays*, 27(10), pp.999-1010.
- 481 Flatt, T., Heyland, A., Rus, F., Porpiglia, E., Sherlock, C., Yamamoto, R., Garbuzov, A.,  
482 Palli, S.R., Tatar, M. and Silverman, N., 2008. Hormonal regulation of the humoral innate  
483 immune response in *Drosophila melanogaster*. *Journal of Experimental Biology*, 211(16),  
484 pp.2712-2724.
- 485 Fricke, C., Ávila-Calero, S. and Armitage, S.A., 2020. Genotypes and their interaction  
486 effects on reproduction and mating-induced immune activation in *Drosophila*  
487 *melanogaster*. *Journal of Evolutionary Biology*, 33(7), pp.930-941.
- 488 Gioti, A., Wigby, S., Wertheim, B., Schuster, E., Martinez, P., Pennington, C.J.,  
489 Partridge, L. and Chapman, T., 2012. Sex peptide of *Drosophila melanogaster* males is a  
490 global regulator of reproductive processes in females. *Proceedings of the Royal Society*  
491 *B: Biological Sciences*, 279(1746), pp.4423-4432.
- 492 Gordon, K.E., Wolfner, M.F. and Lazzaro, B.P., 2022. A single mating is sufficient to  
493 induce persistent reduction of immune defense in mated female *Drosophila*  
494 *melanogaster*. *Journal of Insect Physiology*, p.104414.
- 495 Gupta, V., Ali, Z.S. and Prasad, N.G., 2013. Sexual activity increases resistance against  
496 *Pseudomonas entomophila* in male *Drosophila melanogaster*. *BMC Evolutionary*  
497 *Biology*, 13(1), pp.1-11.
- 498 Gupta, V., Frank, A.M., Matolka, N. and Lazzaro, B.P., 2021. Reliance on polyfunctional  
499 tissue leads to a reproduction-immunity tradeoff due to inherent constraint. *BioRxiv*.
- 500 Imroze, K. and Prasad, N.G., 2011. Mating with large males decreases the immune  
501 defence of females in *Drosophila melanogaster*. *Journal of genetics*, 90(3), pp.427-434.
- 502 Kassambara, A., Kosinski, M., and Biecek, P., 2021. survminer: Drawing Survival  
503 Curves using 'ggplot2'. R package version 0.4.9.



- 504 Kuznetsova, A., Brockhoff, P.B., Christensen, R.H.B., 2017. lmerTest Package: Tests in  
505 Linear Mixed Effects Models. *Journal of Statistical Software*, **82**(13):1–26.
- 506 Lawniczak, M.K., Barnes, A.I., Linklater, J.R., Boone, J.M., Wigby, S. and Chapman, T.,  
507 2007. Mating and immunity in invertebrates. *Trends in ecology & evolution*, *22*(1), pp.48-  
508 55.
- 509 Lazzaro, B.P., Sackton, T.B. and Clark, A.G., 2006. Genetic variation in *Drosophila*  
510 *melanogaster* resistance to infection: a comparison across bacteria. *Genetics*, *174*(3),  
511 pp.1539-1554.
- 512 McGraw, L.A., Gibson, G., Clark, A.G. and Wolfner, M.F., 2004. Genes regulated by  
513 mating, sperm, or seminal proteins in mated female *Drosophila melanogaster*. *Current*  
514 *Biology*, *14*(16), pp.1509-1514.
- 515 McKean, K.A. and Nunney, L., 2001. Increased sexual activity reduces male immune  
516 function in *Drosophila melanogaster*. *Proceedings of the National Academy of*  
517 *Sciences*, *98*(14), pp.7904-7909.
- 518 McKean, K.A. and Nunney, L., 2005. Bateman's principle and immunity: phenotypically  
519 plastic reproductive strategies predict changes in immunological sex  
520 differences. *Evolution*, *59*(7), pp.1510-1517.
- 521 Mulet, M., Gomila, M., Lemaitre, B., Lalucat, J. and García-Valdés, E., 2012. Taxonomic  
522 characterisation of *Pseudomonas* strain L48 and formal proposal of *Pseudomonas*  
523 *entomophila* sp. nov. *Systematic and Applied Microbiology*, *35*(3), pp.145-149.
- 524 Oku, K., Price, T.A. and Wedell, N., 2019. Does mating negatively affect female immune  
525 defences in insects? *Animal biology*, *69*(1), pp.117-136.
- 526 Peng, J., Zipperlen, P. and Kubli, E., 2005. *Drosophila* sex-peptide stimulates female  
527 innate immune system after mating via the Toll and Imd pathways. *Current*  
528 *Biology*, *15*(18), pp.1690-1694.
- 529 R Core Team, 2021. *R: A language and environment for statistical computing*. R  
530 Foundation for Statistical Computing, Vienna, Austria.

- 531 Rodrigues, M.A., Merckelbach, A., Durmaz, E., Kerdaffrec, E. and Flatt, T., 2021.  
532 Transcriptomic evidence for a trade-off between germline proliferation and immunity in  
533 *Drosophila*. *Evolution letters*, 5(6), pp.644-656.
- 534 Rolff, J. and Siva-Jothy, M.T., 2002. Copulation corrupts immunity: a mechanism for a  
535 cost of mating in insects. *Proceedings of the National Academy of Sciences*, 99(15),  
536 pp.9916-9918.
- 537 Rose, M.R., 1984. Laboratory evolution of postponed senescence in *Drosophila*  
538 *melanogaster*. *Evolution*, pp.1004-1010.
- 539 Schwenke, R.A., Lazzaro, B.P. and Wolfner, M.F., 2016. Reproduction–immunity trade-  
540 offs in insects. *Annual review of entomology*, 61, pp.239-256.
- 541 Schwenke, R.A. and Lazzaro, B.P., 2017. Juvenile hormone suppresses resistance to  
542 infection in mated female *Drosophila melanogaster*. *Current Biology*, 27(4), pp.596-601.
- 543 Short, S.M. and Lazzaro, B.P., 2010. Female and male genetic contributions to post-  
544 mating immune defence in female *Drosophila melanogaster*. *Proceedings of the Royal*  
545 *Society B: Biological Sciences*, 277(1700), pp.3649-3657.
- 546 Short, S.M. and Lazzaro, B.P., 2013. Reproductive status alters transcriptomic response  
547 to infection in female *Drosophila melanogaster*. *G3: Genes, Genomes, Genetics*, 3(5),  
548 pp.827-840.
- 549 Short, S.M., Wolfner, M.F. and Lazzaro, B.P., 2012. Female *Drosophila melanogaster*  
550 suffer reduced defense against infection due to seminal fluid components. *Journal of*  
551 *insect physiology*, 58(9), pp.1192-1201.
- 552 Singh, A., Basu, A., Shit, B., Hegde, T., Bansal, N. and Prasad, N.G., 2021. Recurrent  
553 evolution of cross-resistance in response to selection for improved post-infection survival  
554 in *Drosophila melanogaster*. *bioRxiv*.
- 555 Singh, A., Basu, A.K., Bansal, N., Shit, B., Hegde, T. and Prasad, N.G., 2022. Effect of  
556 larval diet on adult immune function is contingent upon selection history and host sex in  
557 *Drosophila melanogaster*. *bioRxiv*.
- 558 Siva-Jothy, M.T., Tsubaki, Y. and Hooper, R.E., 1998. Decreased immune response as a  
559 proximate cost of copulation and oviposition in a damselfly. *Physiological*  
560 *entomology*, 23(3), pp.274-277.

561 Syed, Z.A., Gupta, V., Arun, M.G., Dhiman, A., Nandy, B. and Prasad, N.G., 2020.  
562 Absence of reproduction-immunity trade-off in male *Drosophila melanogaster* evolving  
563 under differential sexual selection. *BMC evolutionary biology*, 20(1), pp.1-10.

564 Therneau, T.M., 2020. coxme: Mixed Effects Cox Models. R package version 2.2-16.

565 Therneau, T.M. 2021. A Package for Survival Analysis in R. R package version 3.2-11.

566 Vodovar, N., Vinals, M., Liehl, P., Basset, A., Degrouard, J., Spellman, P., Boccard, F.  
567 and Lemaitre, B., 2005. *Drosophila* host defense after oral infection by an  
568 entomopathogenic *Pseudomonas* species. *Proceedings of the National Academy of*  
569 *Sciences*, 102(32), pp.11414-11419.

570 Wickham, H., 2016. *ggplot2: Elegant Graphics for Data Analysis*. Springer-Verlag New  
571 York.

572 Winterhalter, W.E. and Fedorka, K.M., 2009. Sex-specific variation in the emphasis,  
573 inducibility and timing of the post-mating immune response in *Drosophila*  
574 *melanogaster*. *Proceedings of the Royal Society B: Biological Sciences*, 276(1659),  
575 pp.1109-1117.

576
